# Supplementary material
Source: PubMed Central journal article supplement (PMC3638191)

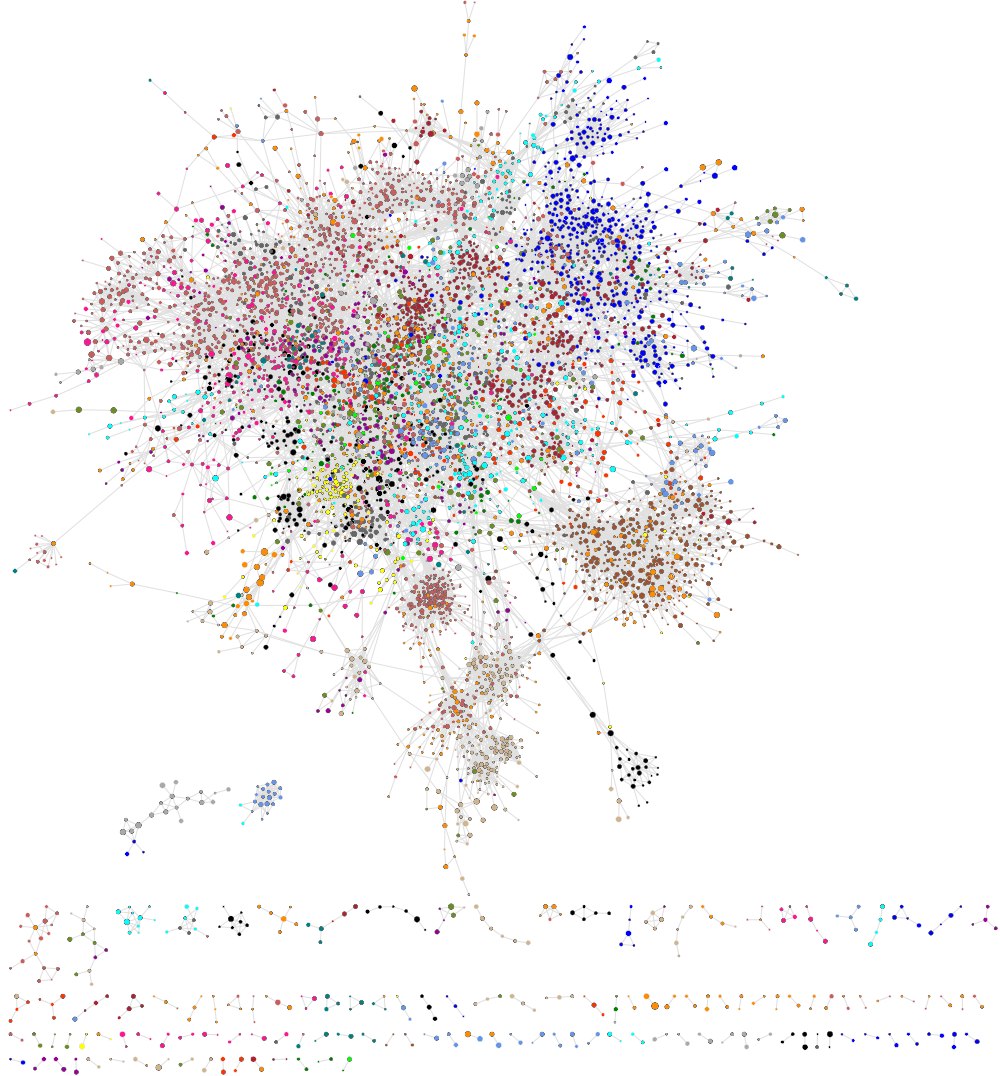

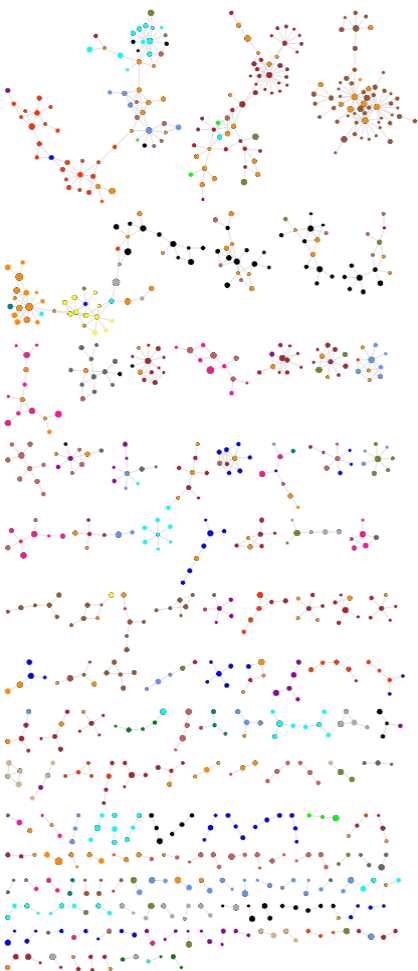

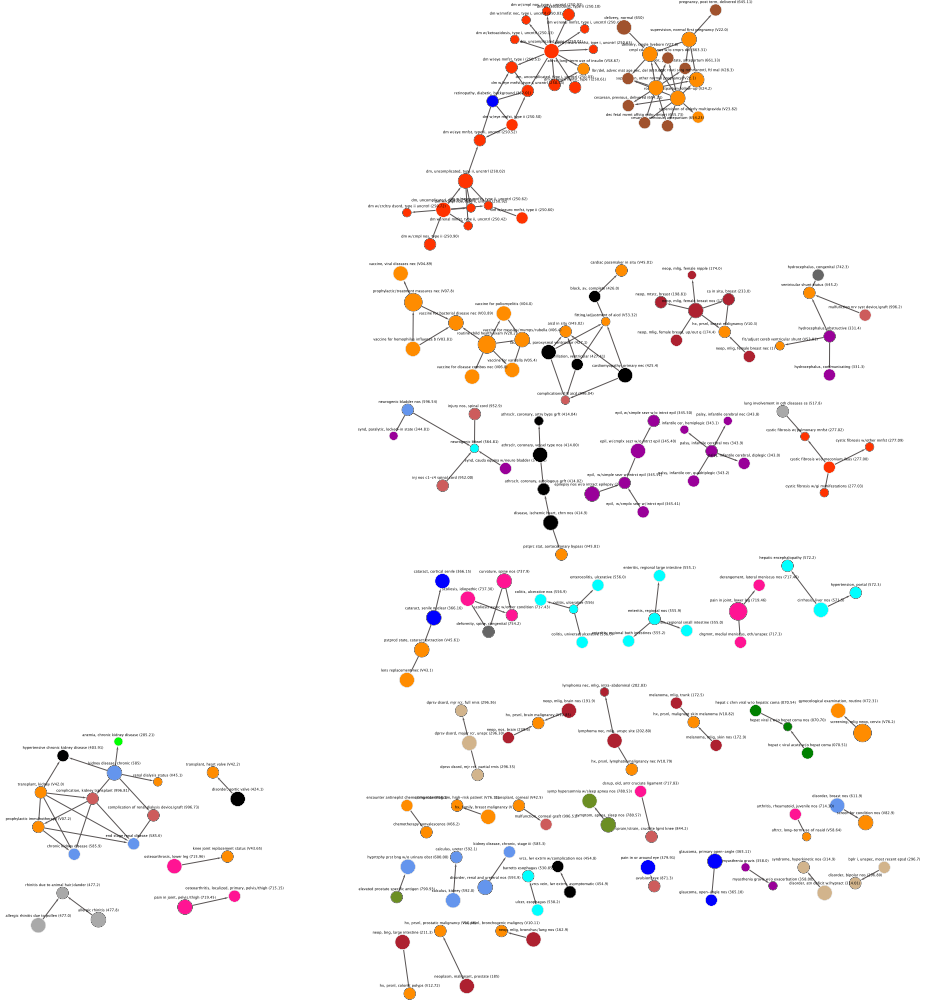

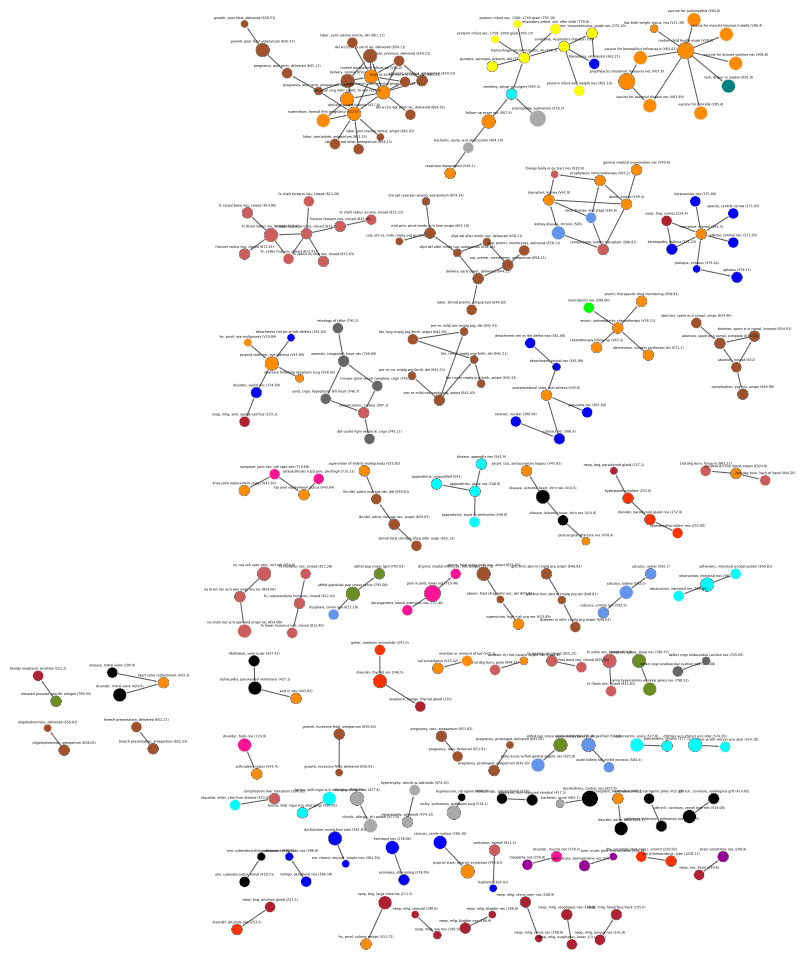

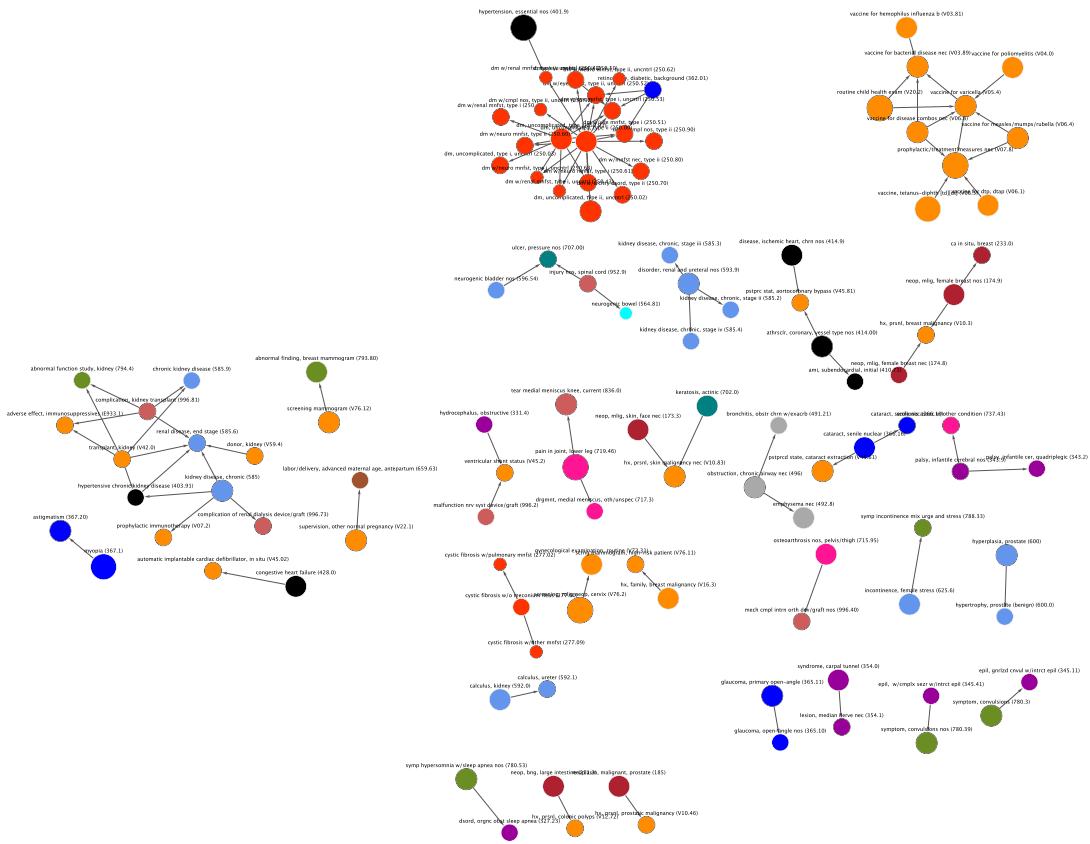

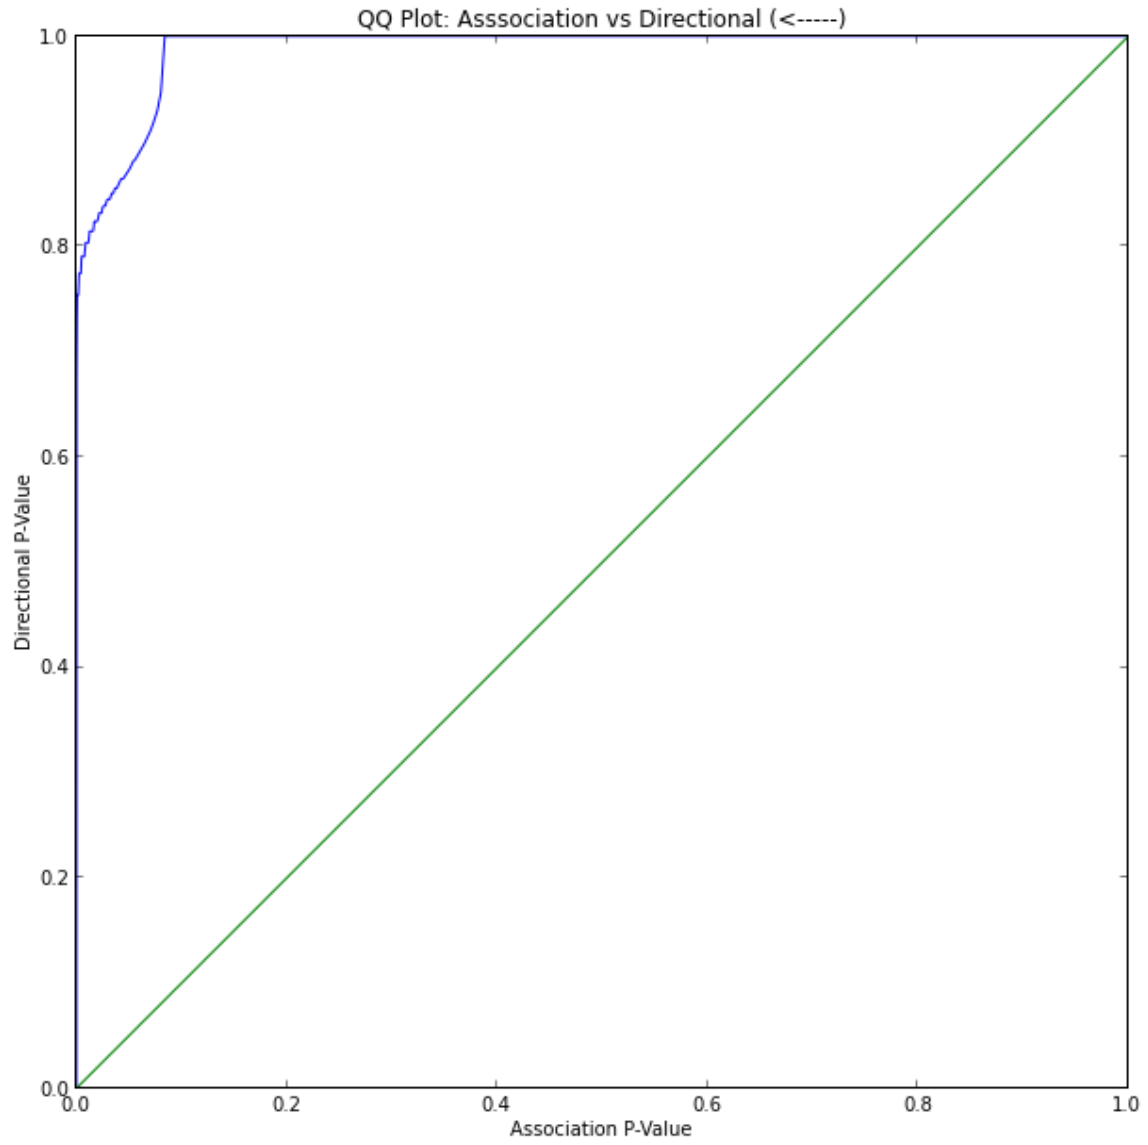

Supplement: supp_amiajnl-2012-001117_amiajnl-2012-001117supp.pdf [file supp_amiajnl-2012-001117_amiajnl-2012-001117supp.pdf]
